# Supplementary material for: Observer aging and long-term avian survey data quality
Source: PubMed Central journal article supplement (PMC4203298; doi:10.1002/ece3.1101), 2014-05-26
Supplement: ece30004-2563-sd1.pdf [file ece30004-2563-sd1.pdf]

# SUPPORTING INFORMATION (APPENDICES)

## 2 Appendix S1. Supplementary figures

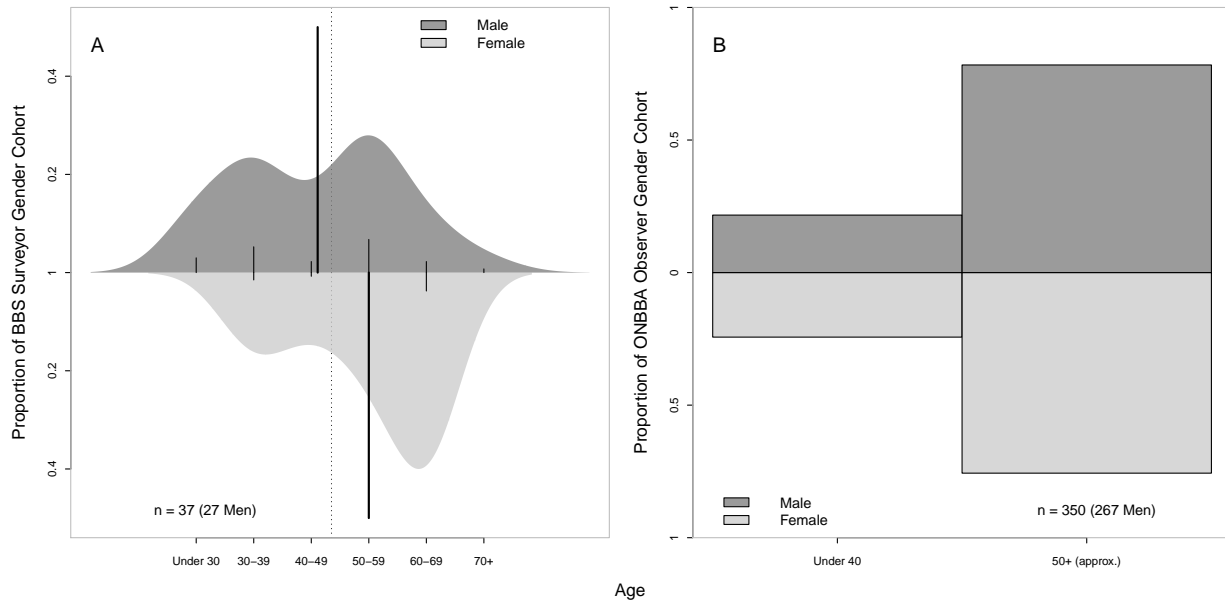

Figure S1. Age distributions among bird surveyor gender cohorts. Panel A shows a beanplot (Kampstra 2008) of the distribution of age ranges among a small sample of BBS observers, based upon demographic information collected by an unrelated internet-based survey of birdwatcher observer effects (Farmer et al. 2012). Tick mark lengths correspond to observer abundance at each age range; the dotted line is the overall mean, solid lines are group means. Panel B shows a barplot of the genders and estimated ages of those ONBBA observers determined for the current study.

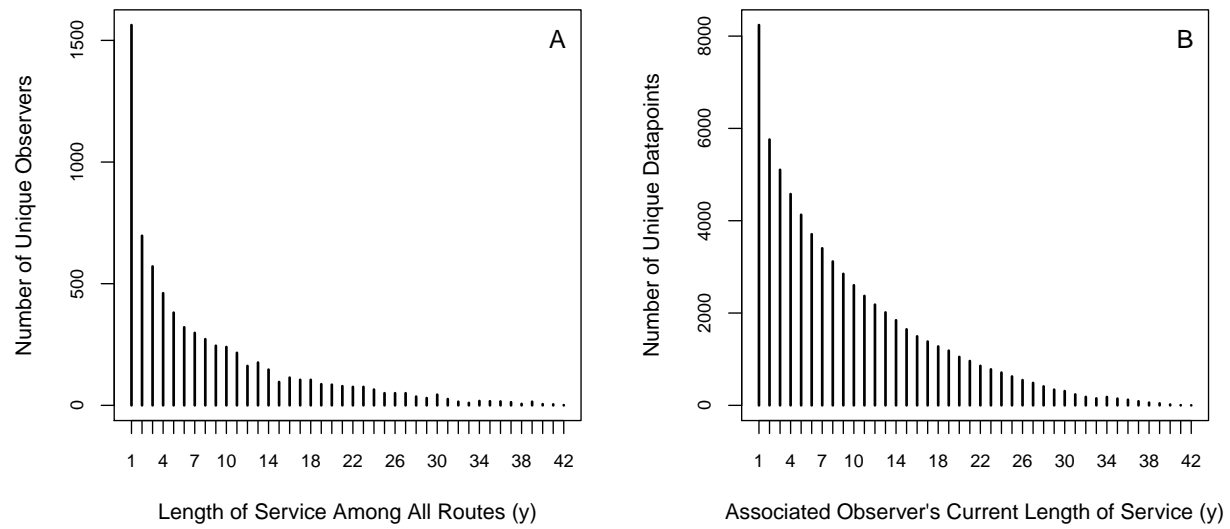

Figure S2. Measures of BBS observer age by (A) unique observer and (B) unique survey (unique combinations of observer, survey route and year), Canada and USA, 1966–2007. The distribution in Panel B is much less skewed towards short lengths of service than in Panel A.

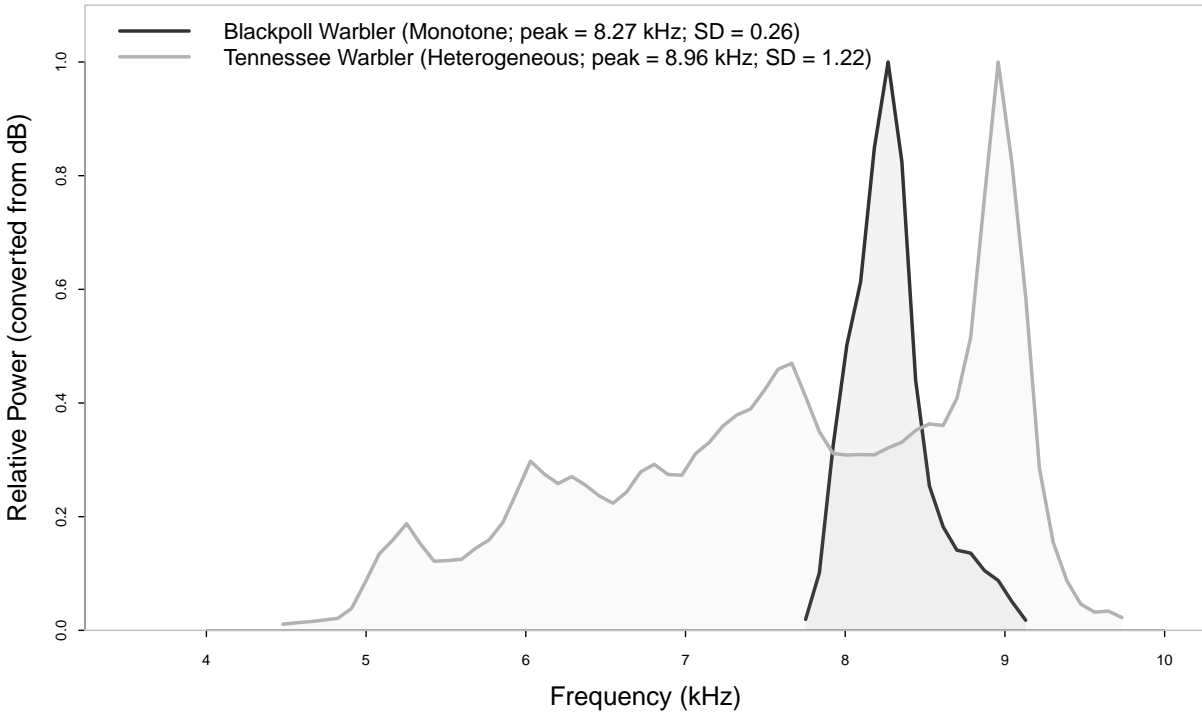

Figure S3. Examples of audiological power spectra corresponding to monotone (Blackpoll Warbler, *Dendroica striata*) and heterogeneous (Tennessee Warbler, *Oreothlypis peregrina*) vocalizations. The modified version displayed here presents the power as a linear-scale version of decibel values for each of a continuous range of frequency bins. Monotone vocalizations tend to feature a single or narrow range of frequencies, whereas heterogeneous vocalizations feature a wide range of sounds. Peak frequency values (kHz) and SD values (as a measure of heterogeneity) are listed for each species.

**Appendix S2. Table of species used in the various hearing-loss analyses.** ‘OBBA’ and ‘BBS’ refer to the analysis of raw data from the Atlas of the Breeding Birds of Ontario and the North American Breeding Bird Survey, respectively. ‘USGS’ and ‘CWS’ refer to analyses of population trends produced by the United States Geological Service and the Canadian Wildlife Service, respectively. Standard species abbreviations are taken from Klimkiewicz and Robbins (1978). Data describing a given species that were used for a given analysis are indicated by an asterisk in the corresponding row and column. Vocalization frequency information for each species, including peak vocalization frequency (Hz) and power spectrum standard deviation (‘SD’, as an index of call heterogeneity) are also provided. Frequency range and heterogeneity classifications are also provided, where *low* frequencies are less than 3 kHz, *‘notch’* frequencies (corresponding to the audiometric notch related to noise-induced hearing loss) are between 3 kHz and less than 6 kHz, *medium* frequencies are between 6 and less than 7 kHz, and *high* frequency calls exceed 7 kHz. Heterogeneous vocalizations are in the upper 50% quantile of standard deviation values for a group of species that includes 19 additional, unmodeled species (not shown).

| Species                  | Abbrev. | OBBA | BBS | USGS | CWS | Peak Freq. (Hz) | SD     | Class             |
|--------------------------|---------|------|-----|------|-----|-----------------|--------|-------------------|
| Red-breasted Nuthatch    | RBNU    | *    | *   | *    | *   | 2670            | 514.22 | Low Monotone      |
| White-breasted Nuthatch  | WBNU    | *    | *   | *    | *   | 2756            | 329.45 | Low Monotone      |
| Brown-crested Flycatcher | BCFL    |      | *   |      |     | 2412            | 717.27 | Low Heterogeneous |
| Great Crested Flycatcher | GCFL    | *    | *   | *    | *   | 2584            | 821.43 | Low Heterogeneous |
| Ash-throated Flycatcher  | ATFL    |      | *   |      |     | 3101            | 319.57 | Notch Monotone    |
| Cassin’s Kingbird        | CAKI    |      | *   |      |     | 3273            | 606.45 | Notch Monotone    |

Continued on next page

Appendix S2, continued

| Species                     | Abbrev. | OBBA | BBS | USGS | CWS | Peak Freq. (Hz) | SD     | Class          |
|-----------------------------|---------|------|-----|------|-----|-----------------|--------|----------------|
| Olive-sided Flycatcher      | OSFL    | *    | *   | *    | *   | 3273            | 523.34 | Notch Monotone |
| Western Wood-Pewee          | WEWP    |      | *   | *    | *   | 3445            | 405.60 | Notch Monotone |
| Say's Phoebe                | SAPH    |      | *   | *    | *   | 3531            | 453.42 | Notch Monotone |
| Scissor-tailed Flycatcher   | STFL    |      | *   |      |     | 3704            | 623.82 | Notch Monotone |
| Gray Flycatcher             | GRFL    |      | *   |      |     | 3790            | 678.03 | Notch Monotone |
| Pygmy Nuthatch              | PYNU    |      |     | *    | *   | 3790            | 317.78 | Notch Monotone |
| Grace's Warbler             | GRWA    |      | *   |      |     | 3876            | 489.64 | Notch Monotone |
| Eastern Wood-Pewee          | EAWP    | *    | *   | *    | *   | 4048            | 475.55 | Notch Monotone |
| Vermilion Flycatcher        | VEFL    |      | *   |      |     | 4048            | 620.00 | Notch Monotone |
| Yellow-bellied Flycatcher   | YBFL    | *    |     | *    | *   | 4134            | 646.14 | Notch Monotone |
| Pine Warbler                | PIWA    | *    | *   | *    | *   | 4221            | 532.83 | Notch Monotone |
| Alder Flycatcher            | ALFL    | *    | *   |      | *   | 4307            | 646.83 | Notch Monotone |
| Brown-headed Nuthatch       | BHNU    |      | *   |      |     | 4393            | 576.00 | Notch Monotone |
| Common Yellowthroat         | COYE    | *    | *   | *    | *   | 4565            | 593.58 | Notch Monotone |
| Eastern Phoebe              | EAPH    | *    | *   | *    | *   | 4823            | 432.01 | Notch Monotone |
| Kentucky Warbler            | KEWA    |      | *   |      |     | 4910            | 684.07 | Notch Monotone |
| Black-throated Gray Warbler | BTYW    |      |     | *    | *   | 5082            | 618.78 | Notch Monotone |
| Orange-crowned Warbler      | OCWA    | *    | *   | *    | *   | 5082            | 562.35 | Notch Monotone |

Continued on next page

Appendix S2, continued

| Species                      | Abbrev. | OBBA | BBS | USGS | CWS | Peak Freq. (Hz) | SD      | Class               |
|------------------------------|---------|------|-----|------|-----|-----------------|---------|---------------------|
| Lucy's Warbler               | LUWA    |      | *   |      |     | 5512            | 630.58  | Notch Monotone      |
| Palm Warbler                 | PAWA    | *    |     | *    | *   | 3618            | 840.98  | Notch Heterogeneous |
| Western Kingbird             | WEKI    |      | *   | *    | *   | 3618            | 1004.12 | Notch Heterogeneous |
| Willow Flycatcher            | WIFL    | *    | *   |      | *   | 3618            | 693.10  | Notch Heterogeneous |
| Ruby-crowned Kinglet         | RCKI    | *    | *   | *    | *   | 3790            | 1144.54 | Notch Heterogeneous |
| Yellow-breasted Chat         | YBCH    |      | *   | *    | *   | 3876            | 1212.40 | Notch Heterogeneous |
| Mourning Warbler             | MOWA    | *    | *   | *    | *   | 3962            | 891.97  | Notch Heterogeneous |
| Hooded Warbler               | HOWA    | *    | *   |      |     | 4048            | 761.85  | Notch Heterogeneous |
| Black-throated Blue Warbler  | BTBW    | *    | *   | *    | *   | 4221            | 713.75  | Notch Heterogeneous |
| Cerulean Warbler             | CERW    | *    | *   |      |     | 4221            | 879.96  | Notch Heterogeneous |
| Yellow-rumped Warbler        | YRWA    | *    |     | *    | *   | 4307            | 832.30  | Notch Heterogeneous |
| Black-throated Green Warbler | BTNW    | *    |     | *    | *   | 4393            | 905.87  | Notch Heterogeneous |
| Louisiana Waterthrush        | LOWA    |      | *   |      |     | 4565            | 796.63  | Notch Heterogeneous |
| Northern Waterthrush         | NOWA    | *    | *   | *    | *   | 4565            | 1111.92 | Notch Heterogeneous |
| Acadian Flycatcher           | ACFL    |      | *   |      |     | 4823            | 755.32  | Notch Heterogeneous |
| Dusky Flycatcher             | DUFL    |      | *   | *    | *   | 4910            | 763.74  | Notch Heterogeneous |
| Magnolia Warbler             | MAWA    | *    | *   | *    | *   | 4910            | 1283.08 | Notch Heterogeneous |
| Connecticut Warbler          | CONW    |      |     | *    | *   | 4996            | 1100.18 | Notch Heterogeneous |

Continued on next page

Appendix S2, continued

| Species                 | Abbrev. | OBBA | BBS | USGS | CWS | Peak Freq. (Hz) | SD      | Class               |
|-------------------------|---------|------|-----|------|-----|-----------------|---------|---------------------|
| MacGillivray's Warbler  | MGWA    |      | *   | *    | *   | 4996            | 708.54  | Notch Heterogeneous |
| Black Phoebe            | BLPH    |      | *   |      |     | 5082            | 951.26  | Notch Heterogeneous |
| Virginia's Warbler      | VIWA    |      | *   |      |     | 5082            | 696.80  | Notch Heterogeneous |
| Hermit Warbler          | HEWA    |      | *   |      |     | 5168            | 919.93  | Notch Heterogeneous |
| Chestnut-sided Warbler  | CSWA    | *    | *   | *    | *   | 5340            | 1101.86 | Notch Heterogeneous |
| Prairie Warbler         | PRWA    |      | *   |      |     | 5340            | 855.07  | Notch Heterogeneous |
| Yellow Warbler          | YWAR    | *    | *   | *    | *   | 5340            | 889.48  | Notch Heterogeneous |
| Townsend's Warbler      | TOWA    |      | *   | *    | *   | 5512            | 860.07  | Notch Heterogeneous |
| Wilson's Warbler        | WIWA    | *    |     | *    | *   | 5771            | 1122.54 | Notch Heterogeneous |
| Canada Warbler          | CAWA    | *    | *   | *    | *   | 5857            | 830.75  | Notch Heterogeneous |
| Hammond's Flycatcher    | HAFL    |      | *   | *    | *   | 5857            | 973.81  | Notch Heterogeneous |
| Yellow-throated Warbler | YTWA    |      | *   |      |     | 5857            | 732.75  | Notch Heterogeneous |
| American Redstart       | AMRE    | *    | *   | *    | *   | 5943            | 915.55  | Notch Heterogeneous |
| Golden-winged Warbler   | GWWA    | *    | *   | *    | *   | 6029            | 424.40  | Medium Monotone     |
| Worm-eating Warbler     | WEWA    |      | *   |      |     | 6546            | 514.35  | Medium Monotone     |
| Blue-winged Warbler     | BWWA    | *    | *   | *    | *   | 6632            | 591.23  | Medium Monotone     |
| Black-and-white Warbler | BAWW    | *    | *   | *    | *   | 6718            | 663.48  | Medium Monotone     |
| Cedar Waxwing           | CEDW    | *    | *   | *    | *   | 6891            | 314.65  | Medium Monotone     |

Continued on next page



Appendix S2, continued

| Species                | Abbrev. | OBBA | BBS | USGS | CWS | Peak Freq. (Hz) | SD      | Class                |
|------------------------|---------|------|-----|------|-----|-----------------|---------|----------------------|
| Brown Creeper          | BRCR    | *    | *   | *    | *   | 6977            | 679.02  | Medium Monotone      |
| Eastern Kingbird       | EAKI    | *    | *   | *    | *   | 6202            | 1171.83 | Medium Heterogeneous |
| Nashville Warbler      | NAWA    | *    | *   | *    | *   | 6202            | 961.56  | Medium Heterogeneous |
| Ovenbird               | OVEN    | *    | *   | *    | *   | 6202            | 991.24  | Medium Heterogeneous |
| Least Flycatcher       | LEFL    | *    | *   | *    | *   | 6718            | 1276.71 | Medium Heterogeneous |
| Northern Parula        | NOPA    | *    | *   | *    | *   | 6891            | 786.68  | Medium Heterogeneous |
| Golden-crowned Kinglet | GCKI    | *    | *   | *    | *   | 7235            | 680.00  | High Monotone        |
| Bay-breasted Warbler   | BBWA    | *    | *   | *    | *   | 7321            | 490.08  | High Monotone        |
| Cape May Warbler       | CMWA    | *    | *   | *    | *   | 7580            | 375.51  | High Monotone        |
| Blackpoll Warbler      | BLPW    | *    |     | *    | *   | 8269            | 257.59  | High Monotone        |
| Prothonotary Warbler   | PROW    |      | *   |      |     | 7494            | 1213.31 | High Heterogeneous   |
| Blackburnian Warbler   | BLBW    | *    | *   | *    | *   | 7666            | 828.64  | High Heterogeneous   |
| Tennessee Warbler      | TEWA    | *    | *   | *    | *   | 8958            | 1216.47 | High Heterogeneous   |

### 3 **Appendix S3. Vocalization heterogeneity**

4 For each species, we obtained an audio recording of its typical vocalizations (calls and songs)  
5 from the Macaulay Library at the Cornell Laboratory of Ornithology (<http://macaulaylibrary.org>)  
6 and generated power spectra from each recording using the free software Audacity  
7 (Beta 1.3; <http://audacity.sourceforge.net/>). Power spectra display the total energy  
8 expended during an audio sample (dB) for each of a contiguous range of narrow frequency  
9 bins (i.e. 2.00–2.08 kHz, 2.081–2.160 kHz; Fig. S3 in Appendix S1). With this approach,  
10 the length of the recordings and the number of vocalizations featured in each recording were  
11 unimportant, as the power spectra considered the power and frequencies of all sounds present  
12 on each recording collectively.

13 By convention, sound intensities (power) are scored on the (logarithmic) decibel scale,  
14 which recognizes that human ears most readily distinguish changes in intensity along such  
15 an axis (Mayfield 1966). Converting a set of sound intensities to linear scales would tend to  
16 de-emphasize softer notes and highlight differences only among sounds of higher intensities.  
17 In our case, this linear-scale approach was appropriate for comparing vocalization variability  
18 because it tended to downplay any background noises present on a given audio track and  
19 emphasize only the dominant singing and calling notes of a given species. Accordingly, we  
20 first rescaled and linearized the log-scale decibel values within each power spectrum using  
21 the formula:

$$22 \quad \text{RelPower}_i = 10^{(\text{Power}_i - \text{Power}_{max}) \cdot 0.1} \quad (1)$$

23 where  $(\text{Power}_i - \text{Power}_{max})$  corresponds to the (negative) linear difference on the decibel scale  
24 between a given power value and the spectrum's maximum power value for  $1, \dots, i$  frequency  
25 bins. This function converts all decibel values to a scale from 0 to 1, where 1 equals the  
26 maximum power output, and it reflects linear-scale power differences (i.e. non-decibel values)  
between any given value and the maximum value.

27 For each set of transformed species vocalization data, we noted the peak acoustic frequency,

28 defined as the upper bound of the frequency bin with the highest power. We then treated the  
29 power spectra as histograms and determined the standard deviations of these ‘distributions’  
30 to quantify their acoustic variability. We compared these standard deviation values among all  
31 species (including standard deviations from 19 additional, unmodeled species), and classified  
32 the vocalizations into ‘monotone’ and ‘heterogeneous’ groups. Heterogeneous vocalizations  
33 were in the upper 50% of standard deviation values (i.e. their calls were more variable); the  
34 remainder were classified as Monotone.

35 **Appendix S4. Hierarchical occupancy model structure**

36 The occupancy component of the models for each species was specified as:

$$z_i \sim \text{Bernoulli}(\psi_i) \tag{2}$$

37

$$\text{logit}(\psi_i) = A_0 + A_1 \cdot \zeta_i \tag{3}$$

38 for  $i = 1, \dots, 1212$  OBBA (atlas) squares, and where  $z_i$  corresponds to the unobserved  
 39 true occupancy state of a given (second-atlas) atlas square (i.e. 0 or 1),  $P(z_i = 1) =$   
 40  $\psi_i$  (the occupancy probability for atlas square  $i$ ), and  $\zeta_i$  is a dummy variable indicating  
 41 detection/nondetection (i.e. 0, 1) of a species by any observer in square  $i$  in the first atlas  
 42 (1981–1985).  $A_0$  and  $A_1$  are logit-scale intercept and first-year occupancy parameters. Data  
 43 used to determine  $\zeta_i$  were derived from a set of 1,325 total observers from the first OBBA.

44 The detection component of the occupancy models for each species was specified as:

$$\text{logit}(p_{ij}) = \beta_1 \cdot \theta_{ij} + b_{obs_j} \tag{4}$$

45

$$b_{obs_j} = \beta_0 + \beta_2 \cdot \text{Over50}_j + \beta_3 \cdot \text{Male}_j + \epsilon_j \tag{5}$$

46 for  $i = 1, \dots, 1212$  atlas squares and  $j = 1, \dots, 350$  observers (or fewer, depending on the  
 47 species being modeled), and where  $p_{ij}$  is the detection probability at square  $i$  for observer  
 48  $j$ ,  $\theta_{ij}$  is the natural log of effort, in party-hours, at square  $i$  by observer  $j$ ,  $\beta_1$  is the effort  
 49 effect, and  $b_{obs_j}$  describes the observer effects. Among these observer effects (equation 5),  
 50  $\beta_0$  is an intercept term,  $\beta_2$  is the age (over-50 vs. under-40) effect,  $\beta_3$  is the effect of being  
 51 male, and  $\epsilon_j$  is mean-zero, normally-distributed error about the observer effect, with the  
 52 uniformly-distributed prior of the variance of this error having lower and upper bounds of 0  
 53 and 10, respectively.  $\text{Over50}_j$  and  $\text{Male}_j$  are dummy variables (0 or 1) indicating whether  
 54 an observer is over age 50 (vs. under age 40), and whether that observer is male (vs. female).

55 The occupancy and detection models are combined in the overall hierarchy, which incorporates

56 observed detections  $Y_{ij}$ :

$$\mu_{ij} = z_i \cdot p_{ij} \tag{6}$$

57

$$Y_{ij} \sim \text{Bin}(N_{ij}, \mu_{ij}) \tag{7}$$

58 where  $Y_{ij}$ , the observed number of detections in square  $i$  for observer  $j$  is binomially distributed  
59 with probability of success  $\mu_{ij}$  (the unconditional detection probability) for  $N_{ij}$  trials (i.e.  
60 the number of years during which an atlas square  $i$  was visited by observer  $j$ , which ranged  
61 from 2 to 5 detection-years).

62 Unless otherwise specified, all parameters in the hierarchical model ( $A_0, A_1, \beta_0, \beta_1, \beta_2,$   
63  $\beta_3$ ) were assigned minimally-informative priors suitable for logistic regression models, which  
64 in most cases need not estimate absolute values greater than 5 (Gelman et al. 2008). We  
65 specifically used normally-distributed priors of standard deviation 3.16 ( $\sqrt{10}$ ).

66 We used enough iterations in WinBUGS to achieve convergence of 3 Markov chains  
67 (with a burn-in of one half of the total), requiring that Gelman-Rubin Rhat statistics for  
68 all parameters be less than or equal to 1.1 to infer convergence. We also ensured that this  
69 model structure performed as intended by testing it with fake datasets of known observer  
70 characteristics (see electronic supplement for example code).

71 **Appendix S5. Detailed methods for modeling changes in BBS count data with**  
72 **increasing observer age**

73 To keep the more heavily-sampled species, observers or strata from having a disproportionate  
74 influence in our aggregated analysis, we modeled our BBS dataset over multiple stages using  
75 GAMMs. First, we modeled mean BBS counts for each species separately as overdispersed  
76 Poisson functions of both observer age and calendar year, correcting for differences among  
77 observers and survey routes as mean-zero, normally-distributed random intercepts. We  
78 used a cubic regression spline smooth term, chosen over thin-plate regression splines for  
79 computational efficiency reasons (Wood 2006), for each of the observer age and calendar  
80 year (i.e. population) effects, where the calendar year effects were smoothed separately for  
81 each stratum. The structure for each species-specific model was as follows:

$$\log(y_{i(j)kl}) = f_1(\tau_{kl}) + f_2(l)_j + \theta_k + \lambda_{i(j)k} + \sigma_{i(j)kl} \quad (8)$$

82 for  $i = 1, \dots, I$  routes within stratum  $j = 1, \dots, J$ ,  $k = 1, \dots, K$  observers, and  $l =$   
83  $1, \dots, L$  calendar years since 1969, and where  $y_{i(j)kl}$  is the number of birds detected on a  
84 route  $i$  in stratum  $j$  by observer  $k$  during year  $l$ ,  $f_1()$  and  $f_2()_j$  are cubic spline smooth  
85 functions estimating age effects across the whole survey and population-related effects for  
86 physiographic stratum  $j$ , respectively,  $\tau_{kl}$  is the (minimum) age of observer  $k$  in year  $l$ ,  $\theta_k$  are  
87 mean-zero, normally-distributed random intercepts for each observer,  $\lambda_{i(j)k}$  are mean-zero,  
88 normally-distributed random intercepts for each observer at a route-within-stratum,  $\sigma_{i(j)kl}$   
89 is mean-zero, normally-distributed overdispersion error, and where datapoints collected by a  
90 given observer were weighted according to the inverse of the number of routes conducted by  
91 that observer for the modeled species.

92 To properly recognize the changes in BBS counts predicted by the smooth function  $f_1()$   
93 in these models (Equation 8), we did not simply extract its values for the modeled range  
94 of observer ages, since this approach would ignore the uncertainty among the separate

95 population-related smooth terms (estimated for each stratum;  $f_2(l)_j$ ). Instead, working  
96 on the scale of the response variable, we defined species- and observer age-specific count  
97 predictions as the average of predictions for each relevant physiographic stratum. Calendar  
98 years were fixed at the midpoint of surveyed dates during predictions. We inferred the  
99 standard error about these averaged predictions,  $\bar{\sigma}_{kl}$ , as the square root of the mean of their  
100 variances.

101 We then built an ‘aggregating’ GAMM which generalized the predicted changes in BBS  
102 counts for each species with increasing observer age (produced above) among each of eight  
103 vocalization frequency groups (e.g. ‘high monotone’, ‘notch heterogeneous’; discussed in  
104 Methods). In addition to generalizing the patterns of age-related count changes among  
105 species, this approach also ensured that each species contributed the same number of datapoints  
106 to the overall model. To convert the data to a common scale among all species, we used  
107 proportions of each species’ maximum count as the (binomial) dependent variable in this  
108 model.

109 Similar to the single-species models (Equation 8), the aggregating GAMM used thin-plate  
110 regression spline smooth functions on observer age for each vocalization group, along with  
111 mean-zero, normally-distributed random intercepts for species. Each datapoint was weighted  
112 according to the inverse of its predicted coefficient of variation (i.e.  $\frac{\hat{\mu}}{\hat{\sigma}}$ ). To provide a  
113 more useful interpretation of the species-independent changes in BBS counts with increasing  
114 observer age, final model predictions were then linearly rescaled relative to the values at  
115 observer-age 1 for each vocalization group. As in the detection probability analysis, we again  
116 ensured that this model structure performed as intended by testing it with fake datasets of  
117 known observer characteristics (see electronic supplement for example code).

## REFERENCES

118

119 Farmer, R. G., M. L. Leonard, and A. G. Horn. 2012. Observer effects and avian call count  
120 survey quality: rare-species biases and overconfidence. *Auk* 129:76–86, doi:10.1525/auk.  
121 2012.11129.

122 Gelman, A., A. Jakulin, M. G. Pittau, and Y. S. Su. 2008. A weakly informative default  
123 prior distribution for logistic and other regression models. *Annals of Applied Statistics*  
124 2:1360–1383, doi:10.1214/08-AOAS191.

125 Kampstra, P. 2008. Beanplot: A boxplot alternative for visual comparison of distributions.  
126 *Journal of Statistical Software* 28:1–9.

127 Klimkiewicz, M. K., and C. S. Robbins. 1978. Standard abbreviations for common names of  
128 birds. *North American Bird Bander* 3:16–25.

129 Mayfield, H. 1966. Hearing loss and bird song. *Living Bird* 5:167–175.

130 Wood, S. N. 2006. *Generalized Additive Models: An Introduction with R*. Chapman and  
131 Hall, New York.
